# Supplementary material
Source: Springer Nature journal article supplement (https://www.springermedizin.de/resource/supplementary/12885_2012_3874_MOESM6_ESM.pdf/9464648)

48h

72h

C

E

T

E+T

C

E

T

E+T

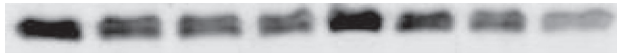

bcl-2

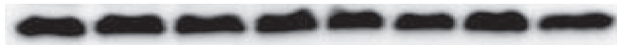

bax

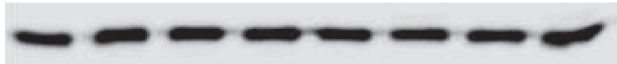

GAPDH

Supplement: MOESM6 [file 9464648]
